# Supplementary material for: Rapid Identification of Intact Staphylococcal Bacteriophages Using Matrix-Assisted Laser Desorption Ionization-Time-of-Flight Mass Spectrometry
Source: PubMed Central journal article supplement (PMC5923470; doi:10.3390/v10040176), 2018-04-04
Supplement: viruses-10-00176-s001.pdf [file viruses-10-00176-s001.pdf]

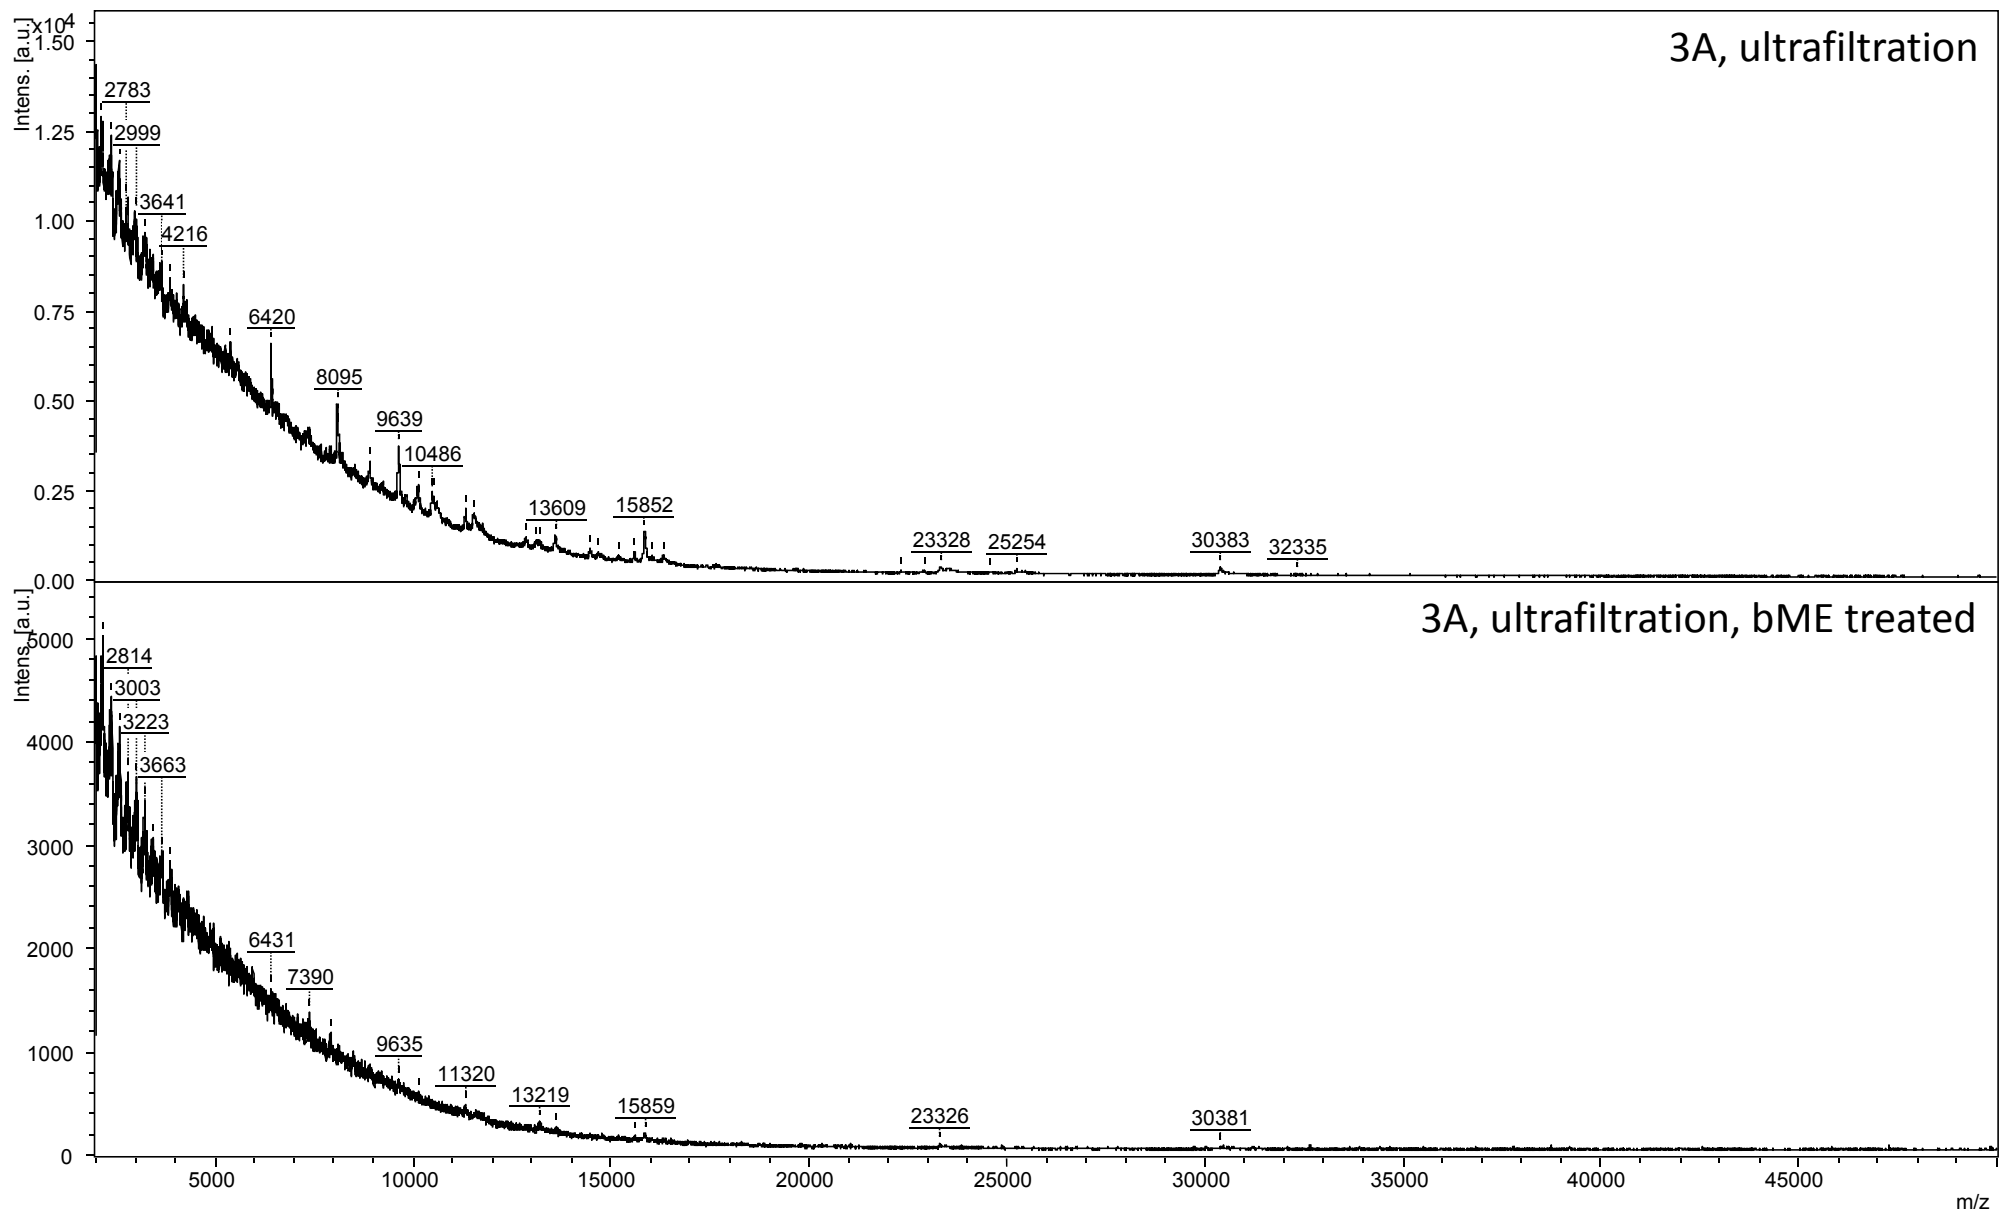

**Figure S1.** Comparison of MALDI-TOF mass spectra obtained from phage 3A purified by 500 kDa Pellicon XL 50 ultrafiltration cassette before and after 10 min treatment with  $\beta$ -mercaptoethanol (bME) in 1:10 v/v ratio.

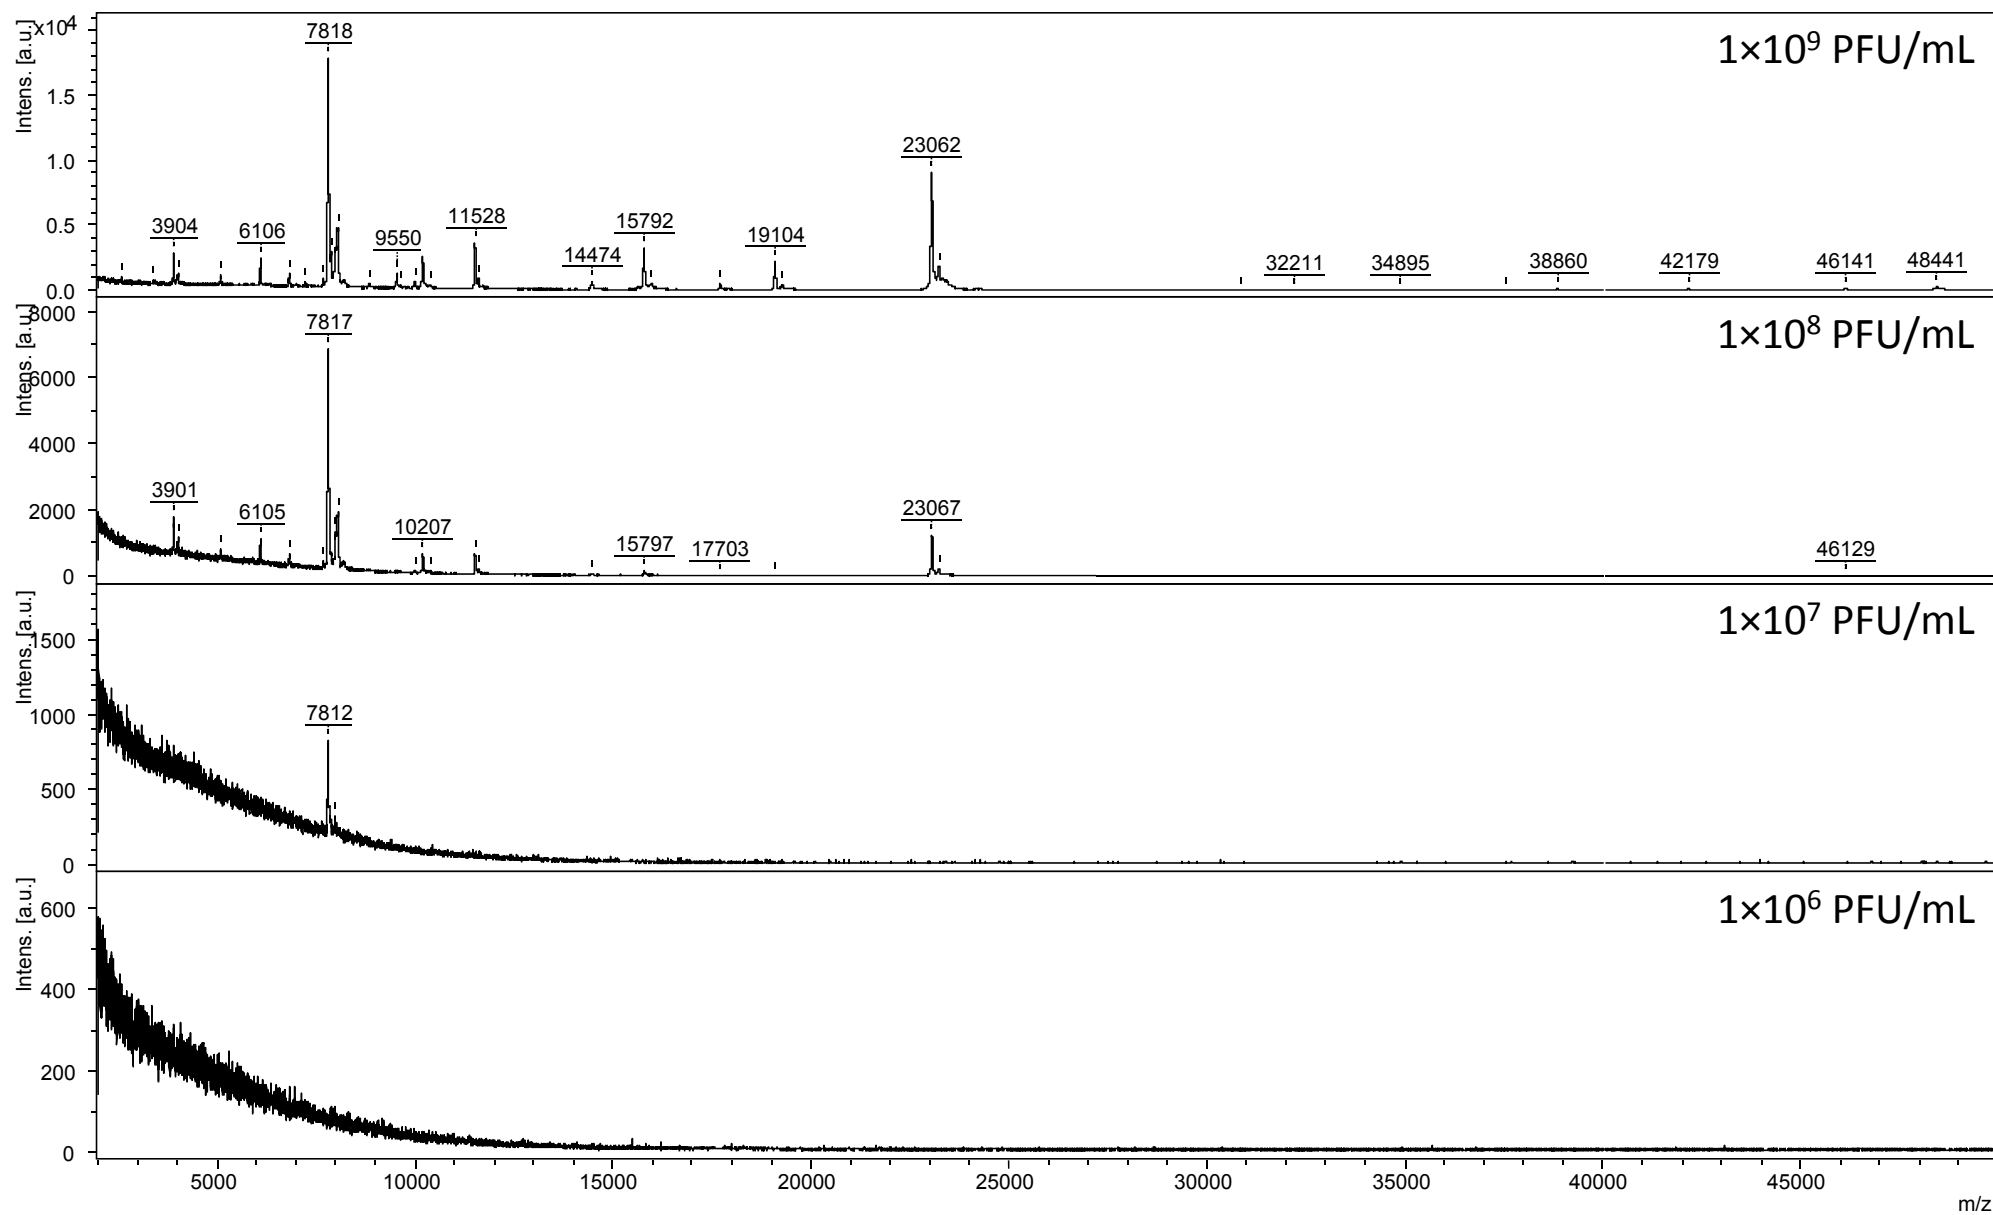

**Figure S2.** MALDI-TOF mass spectra obtained from series of 10-fold dilutions of CsCl purified *Kayvirus* K1/420 with an initial titer 1x10<sup>9</sup> PFU/mL.
